# Supplementary material
Source: Springer Nature journal article supplement (https://www.springermedizin.de/resource/supplementary/12884_2013_1154_MOESM3_ESM.pdf/9459052)
Supplement: MOESM3 [file 9459052]

3,775 records from electronic databases

867 Pubmed

2,551 Embase

151 CINAHL

184 POPLINE

16 LILACS

6 African Index Medicus

16 records from reference lists

691 duplicate records excluded

3,100 unique records screened

2,975 records removed based on  
review of title and abstract

125 full text articles assessed  
for eligibility

86 articles did not meet eligibility  
requirements

39 studies describing 44 data  
sets included in final analysis
